# Supplementary material for: SUMO enhances unfolding of SUMO–polyubiquitin-modified substrates by the Ufd1/Npl4/Cdc48 complex
Source: PubMed Central journal article supplement (PMC9910466; doi:10.1073/pnas.2213703120), 2022-12-27
Supplement: pnas.2213703120.sapp.pdf [file pnas.2213703120.sapp.pdf]

## Supporting Information for

### **SUMO enhances unfolding of SUMO-polyubiquitin-modified substrates by the Ufd1/Npl4/Cdc48 complex**

Hyein G. Lee, Abigail A. Lemmon, and Christopher D. Lima\*

Corresponding Author: Christopher D. Lima

Email: [limac@mskcc.org](mailto:limac@mskcc.org)

#### **This PDF file includes:**

Figures S1 to S8

Tables S1 to S2

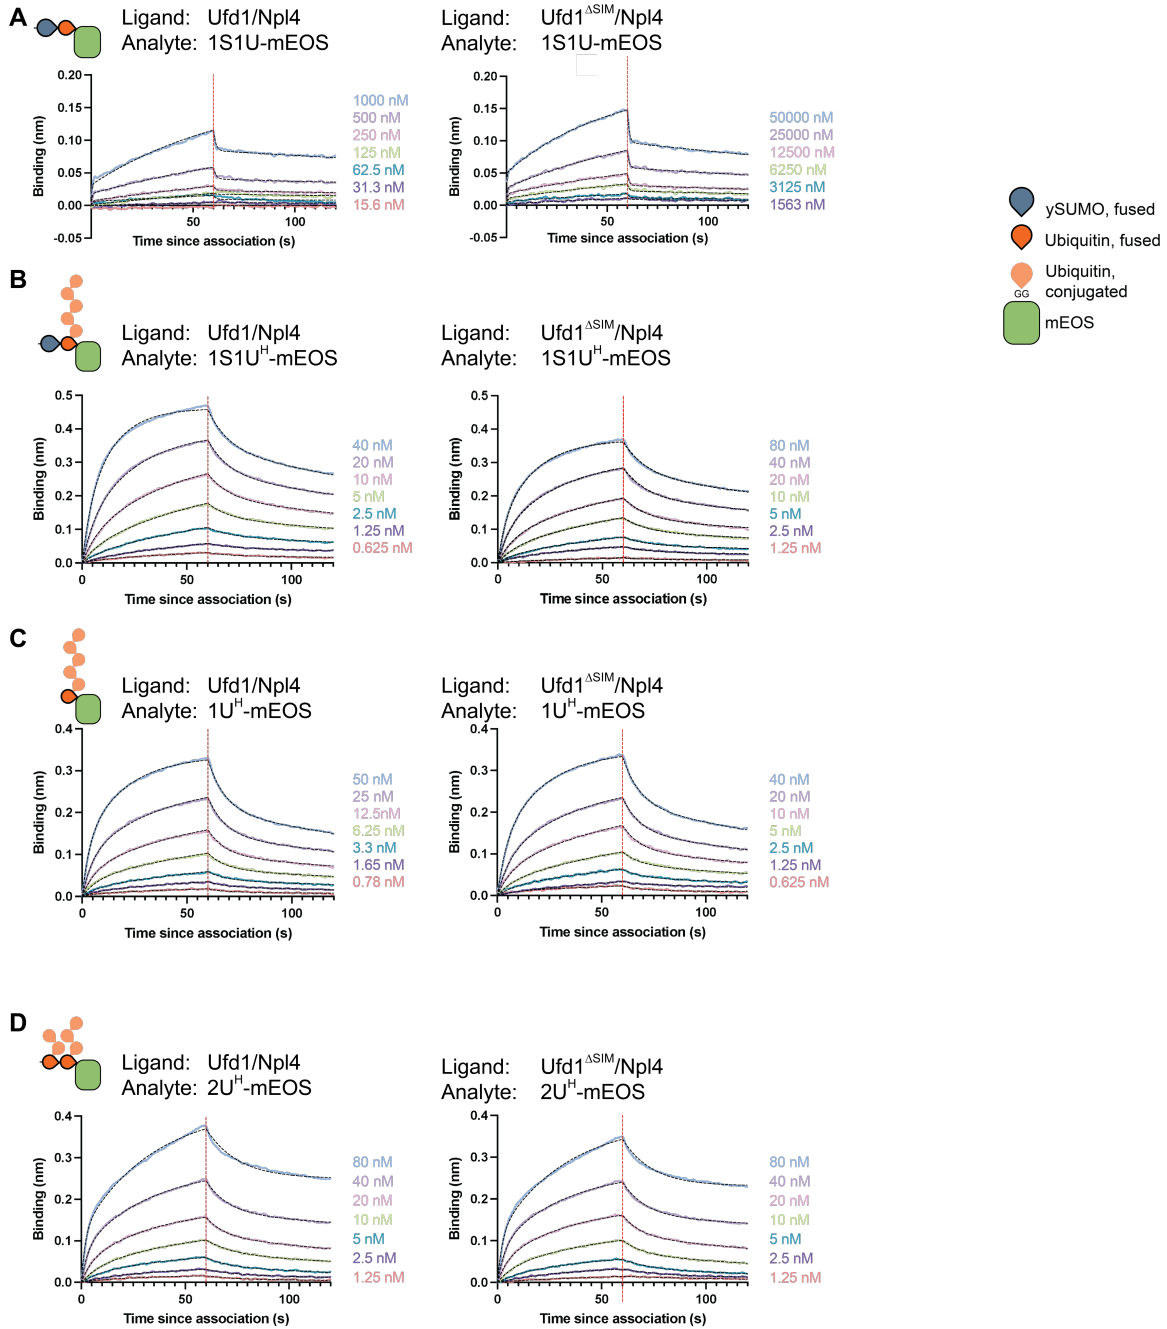

**Fig. S1. Biolayer interferometry measurements.** (A) Binding of wild-type and  $\Delta$ SIM Ufd1/Npl4 to 1S1U-mEOS. (B) Binding of wild-type and  $\Delta$ SIM Ufd1/Npl4 to 1S1U<sup>H</sup>-mEOS. (C) Binding of wild-type and  $\Delta$ SIM Ufd1/Npl4 to 1U<sup>H</sup>-mEOS. (D) Binding of wild-type and  $\Delta$ SIM Ufd1/Npl4 to 2U<sup>H</sup>-mEOS. Time-dependent binding response curves shown with concentrations as in legend and global fit for 2:1 heterogeneous ligand binding model generated by Octet HT Data Analysis program shown as a dashed black curve. Dotted vertical red lines indicate end of association and beginning of dissociation phases.

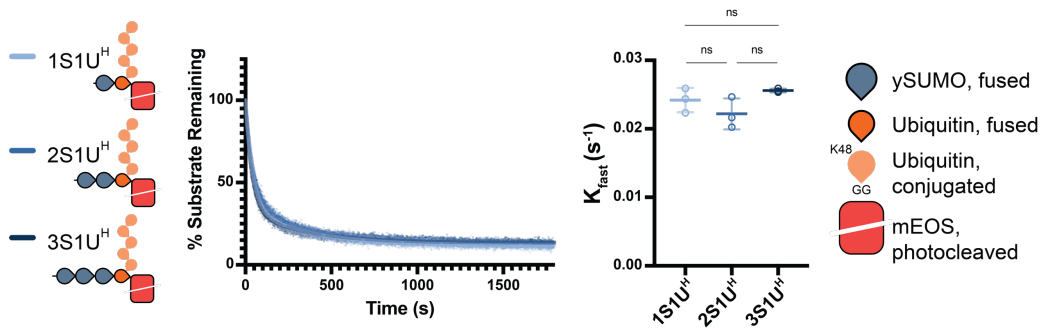

**Fig. S2. Unfolding assay for 1S1U<sup>H</sup>, 2S1U<sup>H</sup>, and 3S1U<sup>H</sup> by wild-type Ufd1/Npl4/Cdc48.** Values were normalized to background fluorescence in the absence of ATP. Plot of three replicates with fit of two-phase non-linear regression.  $K_{fast}$  ( $\text{sec}^{-1}$ ) determined using two phase decay fit. Error bars represent standard deviation. P values calculated by one-way ANOVA with Tukey's test; \* ( $P < 0.05$ ), \*\* ( $P < 0.01$ ), \*\*\* ( $P < 0.001$ ), ns (not significant).

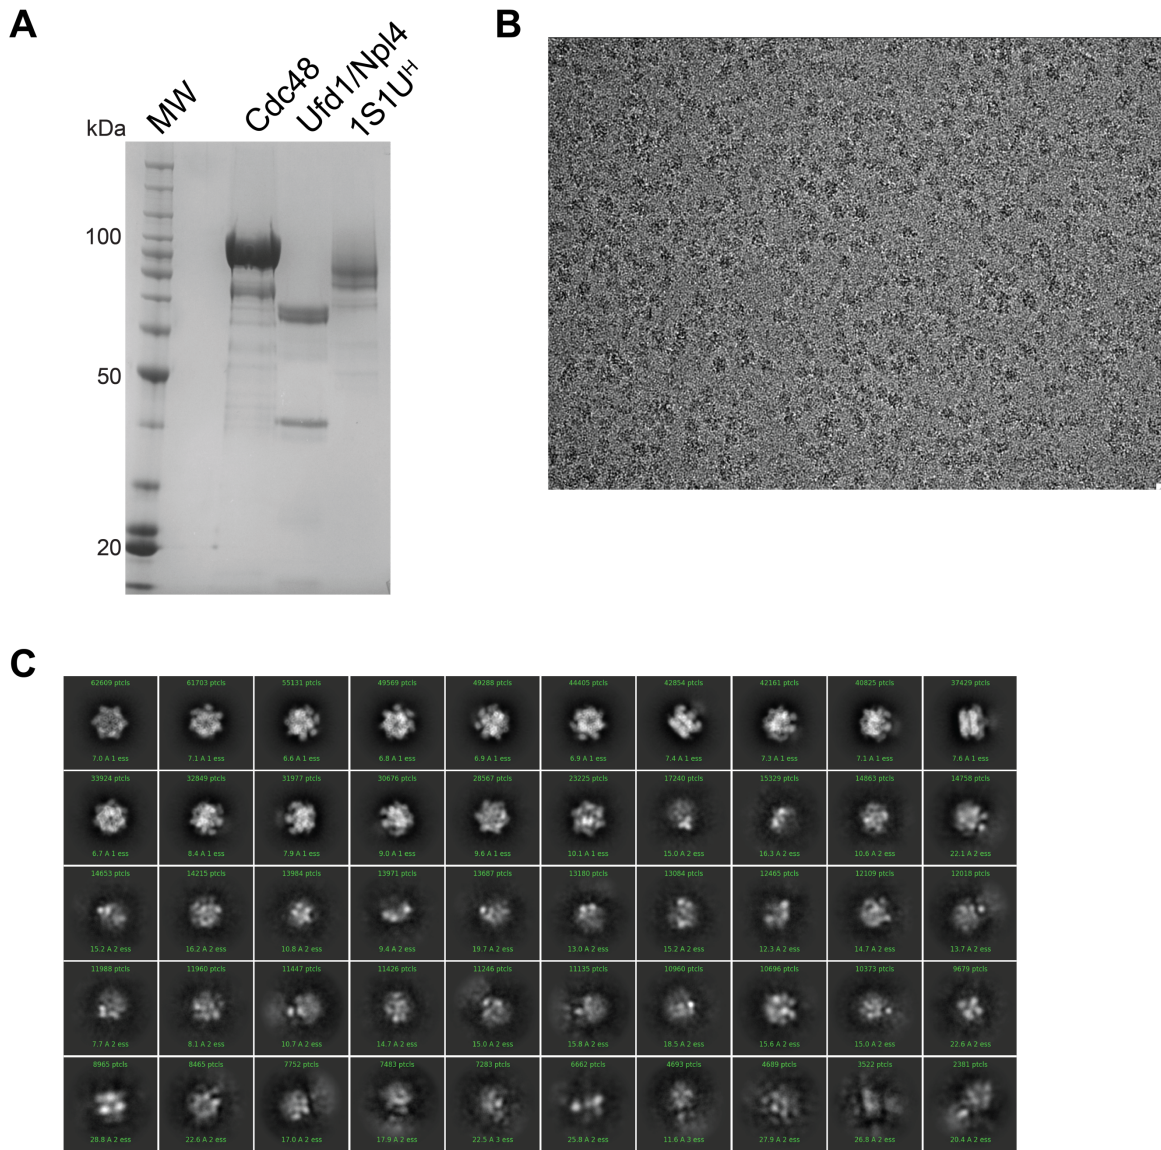

**Fig. S3. Cryo-EM sample preparation and data collection.** (A) SDS-PAGE analysis of components used in sample preparation. Molecular weight marker (MW) is Invitrogen BenchMark Protein Ladder with 20, 50 and 100 kDa shown on the left. (B) Example micrograph from data collection (dataset 1). (C) Output of initial 2D classification of particles.



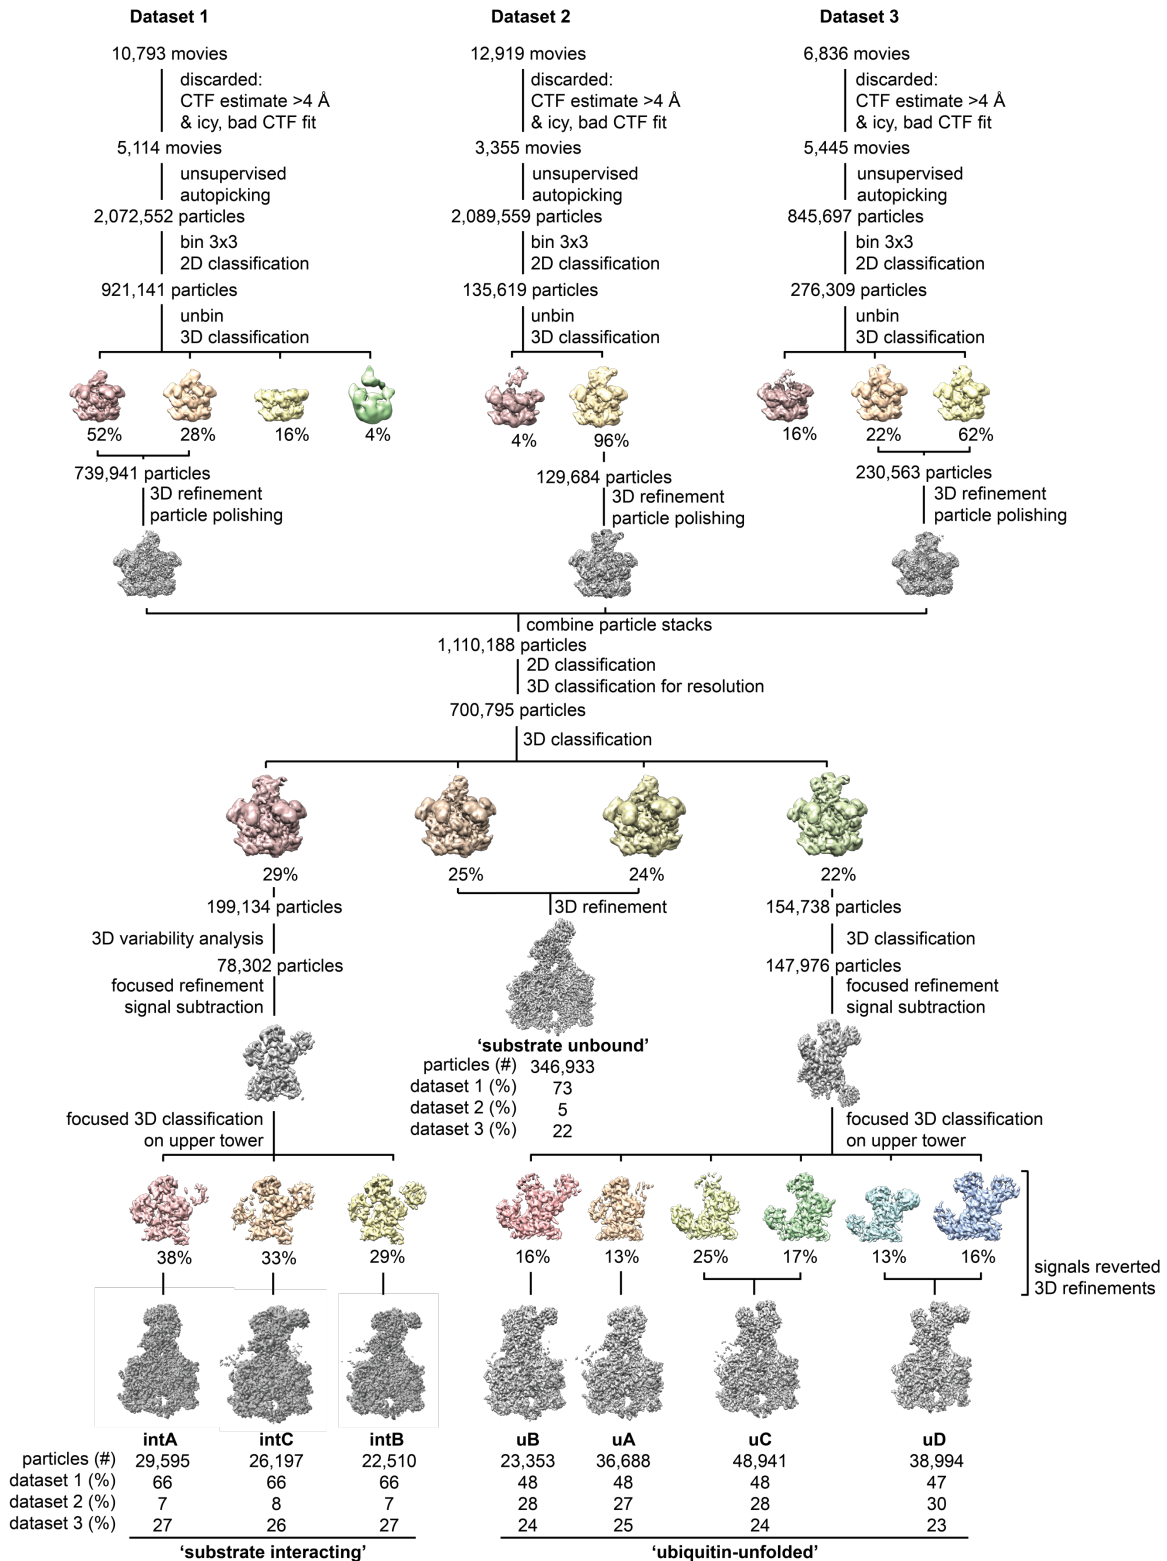

**Fig. S4. Cryo-EM analysis of Ufd1/Npl4/Cdc48 in presence of 1S1U<sup>H</sup>-mEOS and ATP.** Data collection, image processing, refinement, and classification steps shown along with images of reconstructions at each refinement step. Final particle count shown below each state along with the percentage of particles from each dataset for that state.

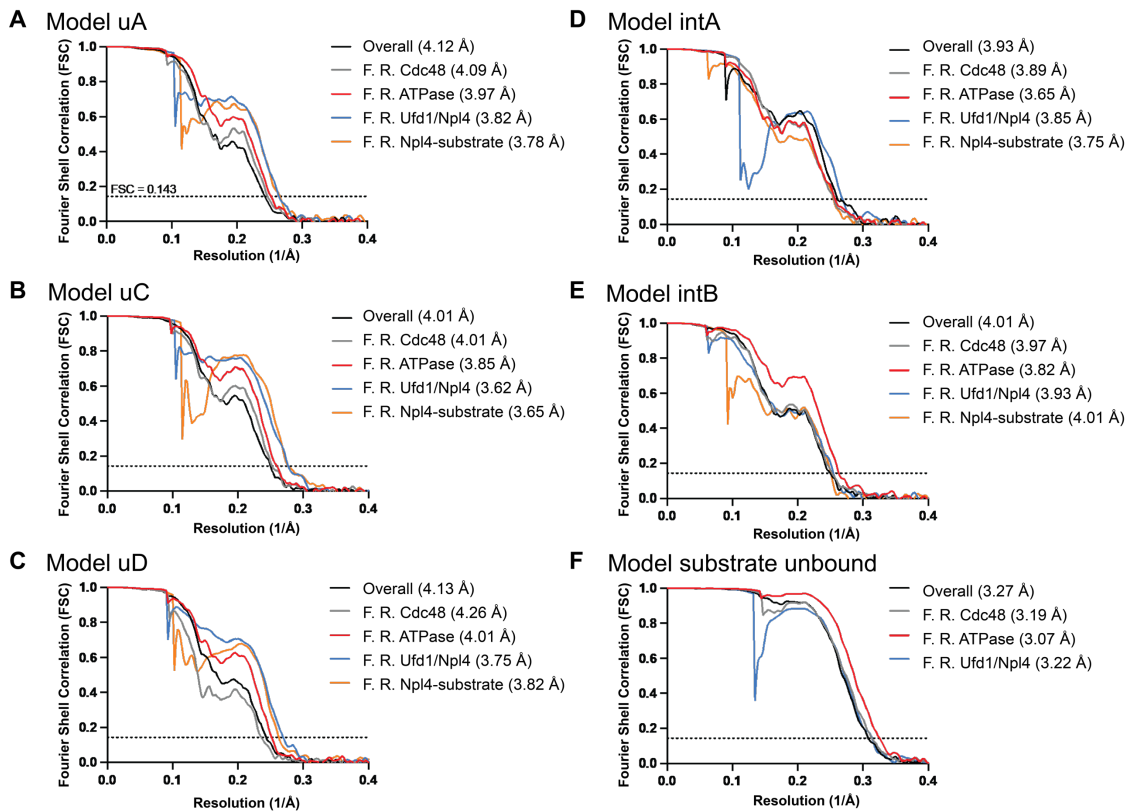

**Fig. S5. FSC curves for cryo-EM reconstructions.** Fourier Shell Correlation between half maps obtained from indicated reconstructions for ubiquitin unfolded state uA (A), uC (B), uD (C), substrate interacting state intA (D), intB (E), and substrate unbound state (F).

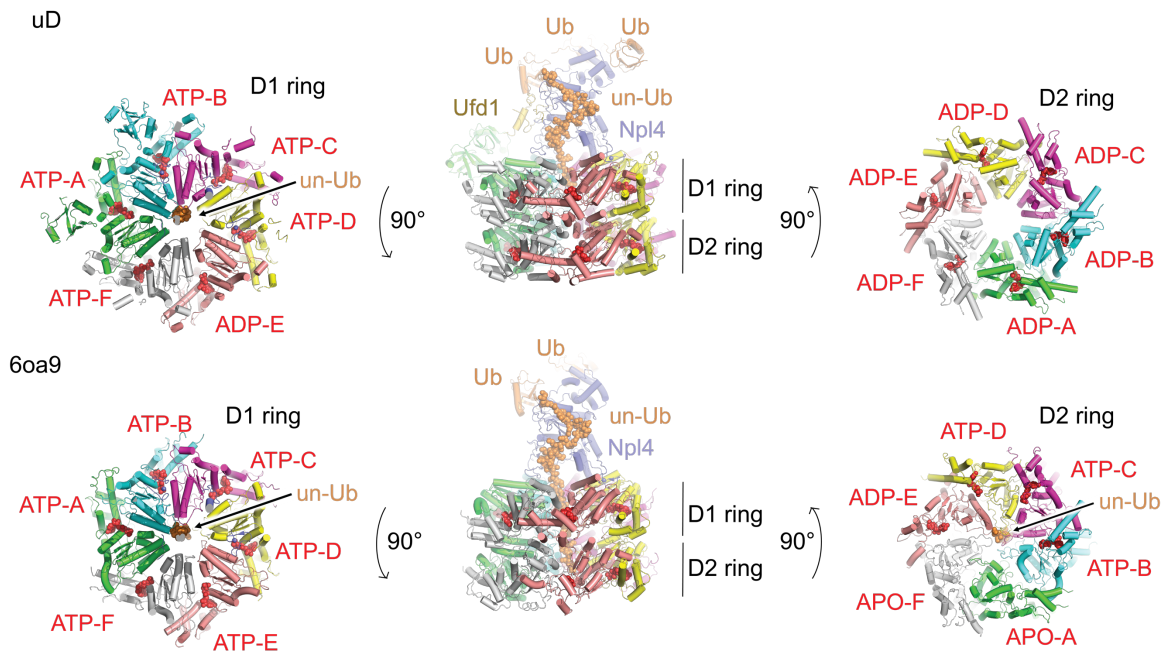

**Fig. S6. Cdc48 comparison.** Cartoon representation and comparison between Cdc48 rings using the ubiquitin unfolded state uD (top) and PDB 6oa9 (bottom), specifically comparing D1 rings and nucleotide occupancy (left), complex composition (middle), and D2 rings (right). Nucleotide identity and occupancy are indicated in red in left and right panels). Cdc48 is colored by protomer with nucleotide (red) and unfolded ubiquitin (light brown; un-Ub) shown as spheres.

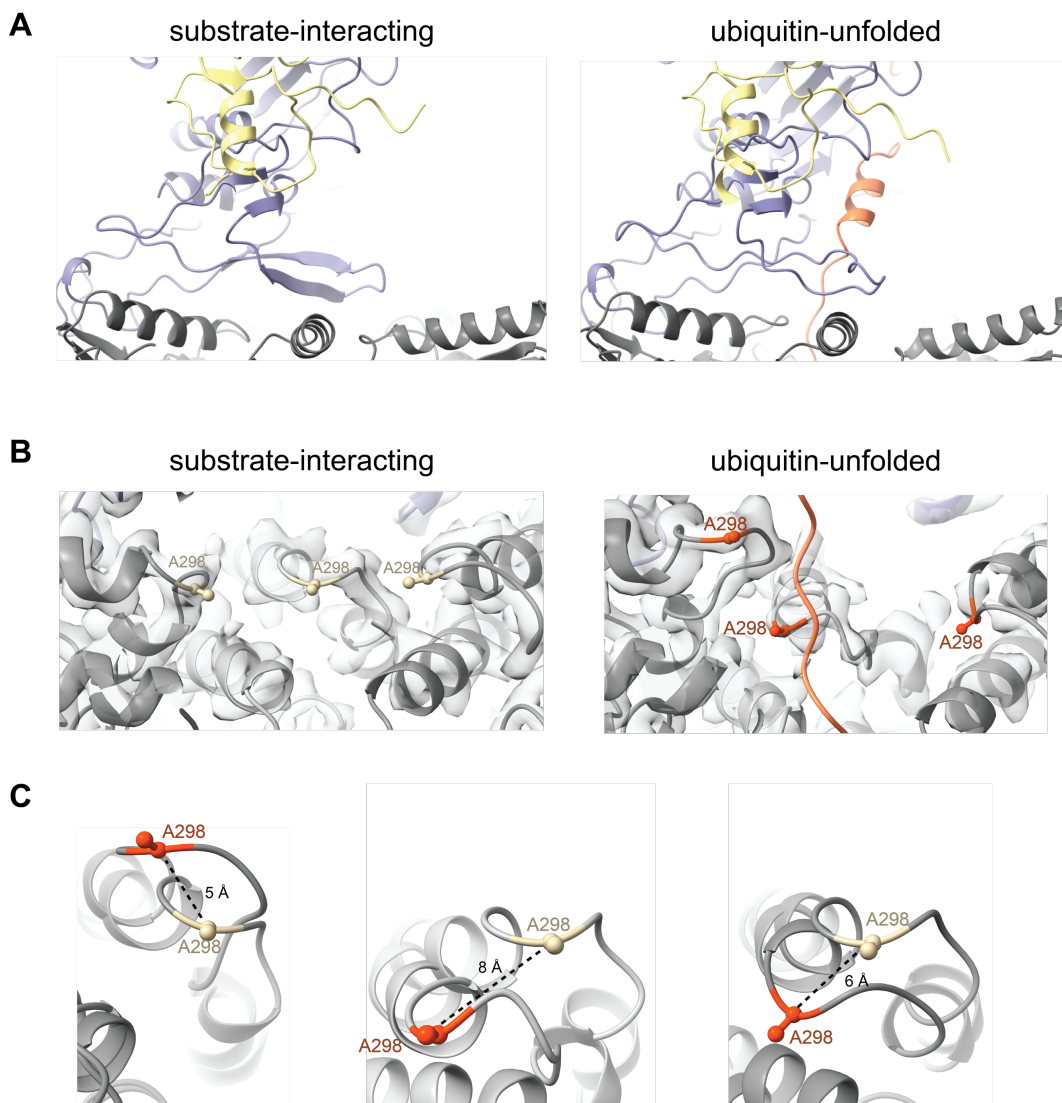

**Fig. S7. Orientation of Cdc48 subunits in substrate-interacting and ubiquitin-unfolded classes.** (A) Placement of Ufd1/Npl4 relative to the Cdc48 differs between substrate-interacting and ubiquitin-unfolded classes. Models shown are state intB (for substrate-interacting) and uC (for ubiquitin-unfolded). Npl4 is in light blue, Ufd1 is in yellow, Cdc48 is in grey, and unfolded ubiquitin is in orange. (B) Relative positioning of Cdc48 monomers with the position of a loop containing Ala298 indicated in the region of Cdc48 that contacts substrate as its being unfolded. In substrate unbound or substrate-interacting classes the Cdc48 hexamer is symmetric and the loops containing Ala298 (colored beige) of respective Cdc48 protomers are in the same plane. In ubiquitin-unfolded classes, adjacent Cdc48 protomers move relative to one another shifting the loop containing Ala298 (colored in red) out of this plane. (C) Close up of the loop containing Ala298 in substrate-interacting class (beige) and ubiquitin unfolded class (red) overlaid in three monomers of Cdc48 indicating the relative change in position of Ala298 within these Cdc48 loops.

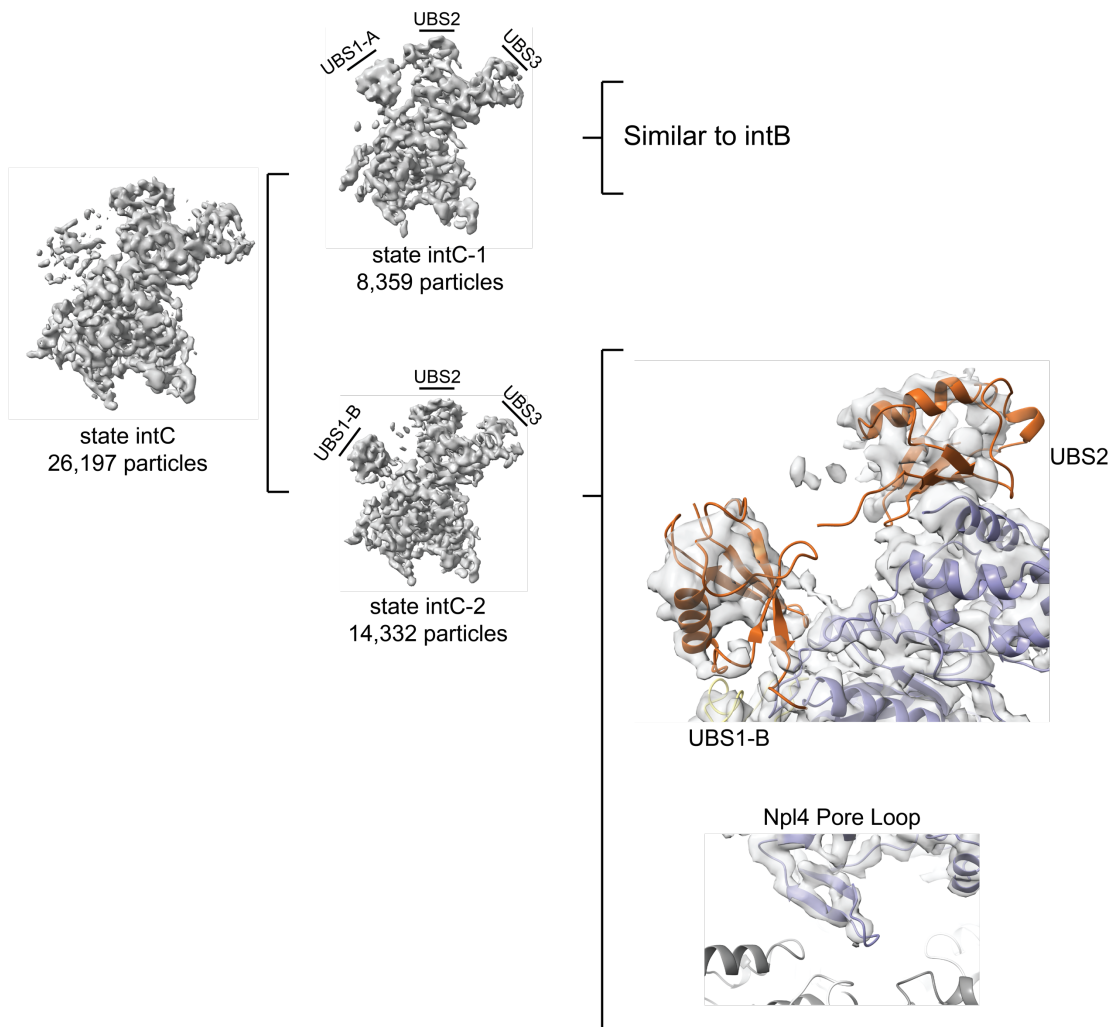

**Fig. S8. Subclassification of state intC.** 3D classification without image alignment of particles in state intC revealed two substates with densities for ubiquitin at UBS1-A or UBS1-B. Overlay of atomic models with the reconstructed map of intC-2 show ubiquitin molecules at positions UBS1-B and UBS2 and a closed conformation for the Npl4 loop, conformations not present in atomic models for intA and intB.

**Table S1. Association and dissociation parameters of interaction between Ufd1/Npl4 and substrates containing SUMO and ubiquitin.**  $K_D$  values derived from steady-state responses while  $K_a$  and  $K_{dis}$  values derived from association and dissociation kinetics fitted to a 2:1 kinetic binding model. Standard error shown.

| Ligand                 | Ufd1 <sup>ΔSIM</sup> /<br>Npl4                | Ufd1/<br>Npl4                                 | Ufd1 <sup>ΔSIM</sup> /<br>Npl4 | Ufd1/<br>Npl4                 | Ufd1 <sup>ΔSIM</sup> /<br>Npl4 | Ufd1/<br>Npl4                 | Ufd1 <sup>ΔSIM</sup> /<br>Npl4 | Ufd1/<br>Npl4                 |
|------------------------|-----------------------------------------------|-----------------------------------------------|--------------------------------|-------------------------------|--------------------------------|-------------------------------|--------------------------------|-------------------------------|
| Analyte                | 2U <sup>H</sup> -<br>mEOS                     | 2U <sup>H</sup> -<br>mEOS                     | 1U <sup>H</sup> -<br>mEOS      | 1U <sup>H</sup> -<br>mEOS     | 1S1U <sup>H</sup> -<br>mEOS    | 1S1U <sup>H</sup> -<br>mEOS   | 1S1U-<br>mEOS                  | 1S1U-<br>mEOS                 |
| $K_D$ 1 (nM)           | <0.001 ±<br>0.001                             | <0.001 ±<br><0.001                            | 5.29 ±<br>0.06                 | 5.71 ±<br>0.07                | 4.97 ±<br>0.10                 | 2.42 ±<br>0.04                | 1.13*10 <sup>4</sup> ±<br>300  | 193 ±<br>11                   |
| $K_D$ 2 (nM)           | 15.7 ± 0.2                                    | 13.4 ± 0.2                                    | 40.7 ± 0.6                     | 34 ± 0.4                      | 34.2 ± 0.6                     | 26.4 ±<br>0.5                 | 1.38*10 <sup>4</sup> ±<br>960  | 309 ±<br>39                   |
| $K_a$ 1<br>(x1,000/Ms) | 411 ± 4                                       | 384 ± 3                                       | 1020 ± 6                       | 906 ± 5                       | 704 ± 4                        | 1760 ± 7                      | 0.322 ±<br>0.008               | 11.8 ±<br>0.6                 |
| $K_a$ 2<br>(x1,000/Ms) | 4300 ± 46                                     | 4790 ± 51                                     | 2950 ± 40                      | 3620 ±<br>40                  | 2620 ± 36                      | 3790 ±<br>61                  | 81.7 ± 5                       | 2770 ±<br>320                 |
| $K_{dis}$ 1(/s)        | 1.54*10 <sup>-7</sup> ±<br>7*10 <sup>-7</sup> | <1.0*10 <sup>-7</sup> ±<br>3*10 <sup>-7</sup> | 0.005 ±<br>6*10 <sup>-5</sup>  | 0.005 ±<br>6*10 <sup>-5</sup> | 0.004 ±<br>7*10 <sup>-5</sup>  | 0.004 ±<br>6*10 <sup>-5</sup> | 0.004 ±<br>4*10 <sup>-5</sup>  | 0.002 ±<br>7*10 <sup>-5</sup> |
| $K_{dis}$ 2(/s)        | 0.068 ±<br>0.004                              | 0.064 ±<br>0.0004                             | 0.12 ±<br>0.0009               | 0.123 ±<br>0.0008             | 0.09 ±<br>0.001                | 0.1 ±<br>0.001                | 1.13 ±<br>0.03                 | 0.857 ±<br>0.04               |

**Table S2. Statistics for data collection and refinement.**

| <b>Data Collection</b>                 | Dataset 1    |            | Dataset 2  |           | Dataset 3 |           |
|----------------------------------------|--------------|------------|------------|-----------|-----------|-----------|
| Magnification                          | 22,500x      |            |            |           |           |           |
| Voltage (kV)                           | 300          |            |            |           |           |           |
| Electron exposure (e-/Å <sup>2</sup> ) | 72           |            |            |           |           |           |
| Defocus range (µm)                     | -1.0 to -2.5 |            |            |           |           |           |
| Super-resolution pixel size (Å)        | 0.532        |            |            |           |           |           |
| Fourier cropped pixel size (Å)         | 1.064        |            |            |           |           |           |
| Initial particle projections (#)       | 700,795      |            |            |           |           |           |
| Symmetry                               | C1           |            |            |           |           |           |
|                                        | unbound      | intA       | intB       | uA        | uC        | uD        |
| PDB accession codes                    | 8DAR         | 8DAS       | 8DAT       | 8DAU      | 8DAV      | 8DAW      |
| Final particle projections (#)         | 346,933      | 29,595     | 22,510     | 36,688    | 49,941    | 38,994    |
| Map res (Å) FSC threshold = 0.143      |              |            |            |           |           |           |
| Overall map (Å)                        | 3.3          | 3.9        | 4.0        | 4.1       | 4.0       | 4.1       |
| Focused Refinement: Cdc48 (Å)          | 3.8          | 3.9        | 4.0        | 4.1       | 4.0       | 4.3       |
| ATPase (Å)                             | 3.6          | 3.7        | 3.8        | 4.0       | 3.9       | 4.0       |
| Ufd1/Npl4 tower (Å)                    |              | 3.9        | 3.9        | 3.8       | 3.6       | 3.8       |
| Npl4-substrate (Å)                     |              | 3.8        | 4.0        | 3.8       | 3.7       | 3.8       |
| Local resolution range                 |              |            |            |           |           |           |
| Overall map (Å)                        | 2.8 - 7.6    | 3.2 - 8.2  | 3.2 - 10.5 | 3.3 - 9.4 | 3.3 - 8.7 | 3.5 - 8.7 |
| Focused Refinement: Cdc48 (Å)          | 2.8 - 6.6    | 3.3 - 10.0 | 3.3 - 10.0 | 3.4 - 8.4 | 3.4 - 7.7 | 3.5 - 8.3 |
| ATPase (Å)                             | 2.9 - 4.5    | 3.2 - 5.7  | 3.3 - 6.6  | 3.4 - 7.1 | 3.4 - 6.7 | 3.4 - 7.1 |
| Ufd1/Npl4 tower (Å)                    | 2.9 - 5.0    | 3.1 - 6.2  | 3.5 - 8.2  | 3.3 - 5.5 | 3.1 - 5.1 | 3.2 - 5.3 |
| Npl4-substrate (Å)                     | N/A          | 3.1 - 4.9  | 3.6 - 6.0  | 3.2 - 5.0 | 3.0 - 4.8 | 3.3 - 5.4 |
| <b>Refinement</b>                      |              |            |            |           |           |           |
| Initial models used                    | 6OA9, 1UBQ   |            |            |           |           |           |
| Model res (Å) FSC threshold = 0.5      | 3.3          | 3.9        | 4          | 4.1       | 3.8       | 3.9       |
| <i>Model composition</i>               |              |            |            |           |           |           |
| Non-hydrogen atoms                     | 30,157       | 34,059     | 34,635     | 34,248    | 34,248    | 34,848    |
| Protein residues                       | 3,827        | 4,315      | 4,388      | 4,342     | 4,342     | 4,418     |
| Ligand (Zn)                            | 2            | 2          | 2          | 2         | 2         | 2         |
| Ligand (ATP)                           | 6            | 5          | 5          | 5         | 5         | 5         |
| Ligand (ADP)                           | 6            | 7          | 7          | 7         | 7         | 7         |
| <i>Mean B factors</i>                  |              |            |            |           |           |           |
| Protein                                | 55.57        | 123.03     | 134.51     | 149.12    | 121.15    | 143.49    |
| Ligands                                | 47.68        | 107.99     | 118.39     | 140.51    | 113.21    | 133.33    |
| <i>RMS deviations</i>                  |              |            |            |           |           |           |
| Bond lengths                           | 0.004        | 0.003      | 0.003      | 0.003     | 0.004     | 0.004     |
| Bond angles                            | 0.603        | 0.553      | 0.534      | 0.932     | 0.958     | 0.985     |
| <i>Validation</i>                      |              |            |            |           |           |           |
| Molprobrity score                      | 1.88         | 1.96       | 1.84       | 1.87      | 1.85      | 1.87      |
| Clash score                            | 6.06         | 7.37       | 7.14       | 9.62      | 9.34      | 9.62      |
| Rotamer Outliers (%)                   | 1.93         | 1.89       | 1.34       | 0.90      | 0.79      | 0.48      |
| C-beta deviations                      | 0.00         | 0.00       | 0.00       | 0.25      | 0.25      | 0.22      |
| <i>Ramachandran plot</i>               |              |            |            |           |           |           |
| % favored                              | 95.33        | 95.07      | 95.01      | 94.67     | 94.81     | 94.64     |
| % allowed                              | 4.67         | 4.93       | 4.97       | 5.31      | 5.15      | 5.31      |
| % outliers                             | 0.00         | 0.00       | 0.00       | 0.02      | 0.05      | 0.05      |
